# Supplementary material for: The effect of dynamically heterogeneous interphases on the particle dynamics of polymer nanocomposites
Source: Royal Society of Chemistry journal article supplement (doi:10.1039/d2sm01617f), 2023-01-01
Supplement: d2sm01617f1.pdf [file d2sm01617f1.pdf]

## Effect of Dynamically Heterogeneous Interphases on Particle Dynamics of Polymer Nanocomposites

Di Wu<sup>†</sup>, Suresh Narayanan<sup>§</sup>, Ruhao Li<sup>†</sup>, Yi Feng<sup>†</sup> and Pinar Akcora<sup>†,\*</sup>

<sup>†</sup>Department of Chemical Engineering and Materials Science, Stevens Institute of Technology,  
Hoboken, New Jersey 07030, United States

<sup>§</sup>Advanced Photon Source, Argonne National Laboratory, Lemont, Illinois 60439, United States

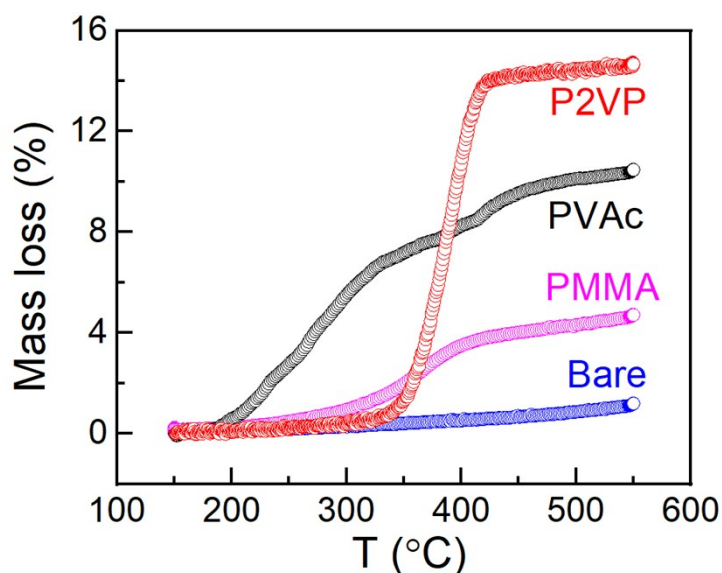

**Figure S1.** TGA data of polymer adsorbed SiO<sub>2</sub> nanoparticles.

The chain densities were calculated by  $\sigma = a \frac{N_A \rho r}{3M}$ , where  $\sigma$  is the chain density (chains/nm<sup>2</sup>),  $a$  is the mass ratio between polymer and particle from the TGA result,  $N_A$  is the Avogadro constant,  $\rho$  is the density of the particle (SiO<sub>2</sub>, 2.65 g/cm<sup>3</sup>),  $r$  is the mean radius of the particle, ~6.25 nm,  $M$  is the molecular weight of the polymer.

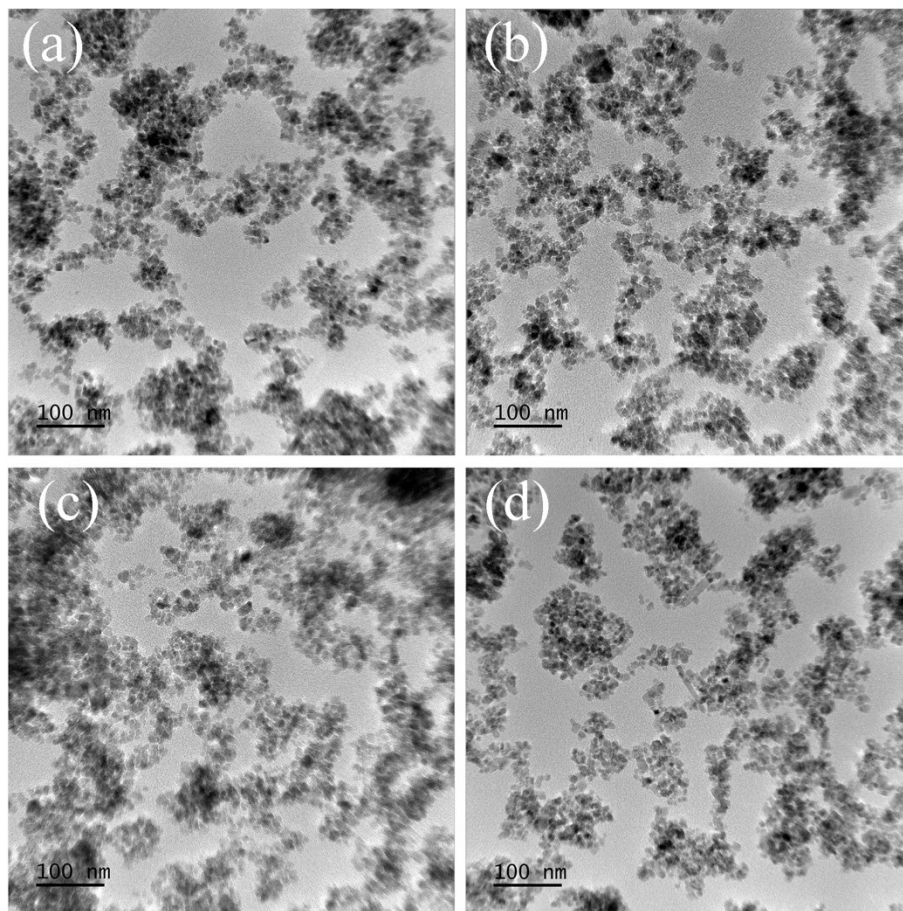

**Figure S2.** TEM images of cryomicrotomed PMA nanocomposites. Data show aggregation states of  $\text{Fe}_3\text{O}_4$  nanoparticles adsorbed with (a) 35 kDa PMMA, (b) 50 kDa PVAc, and (c) 40 kDa P2VP. (d) PMA nanocomposite with bare  $\text{Fe}_3\text{O}_4$  nanoparticles. All samples are at 10 vol% loading<sup>1</sup>. Adapted from *J. Appl. Phys.* 2021, 130 (6), 064701 with the permission of AIP Publishing.

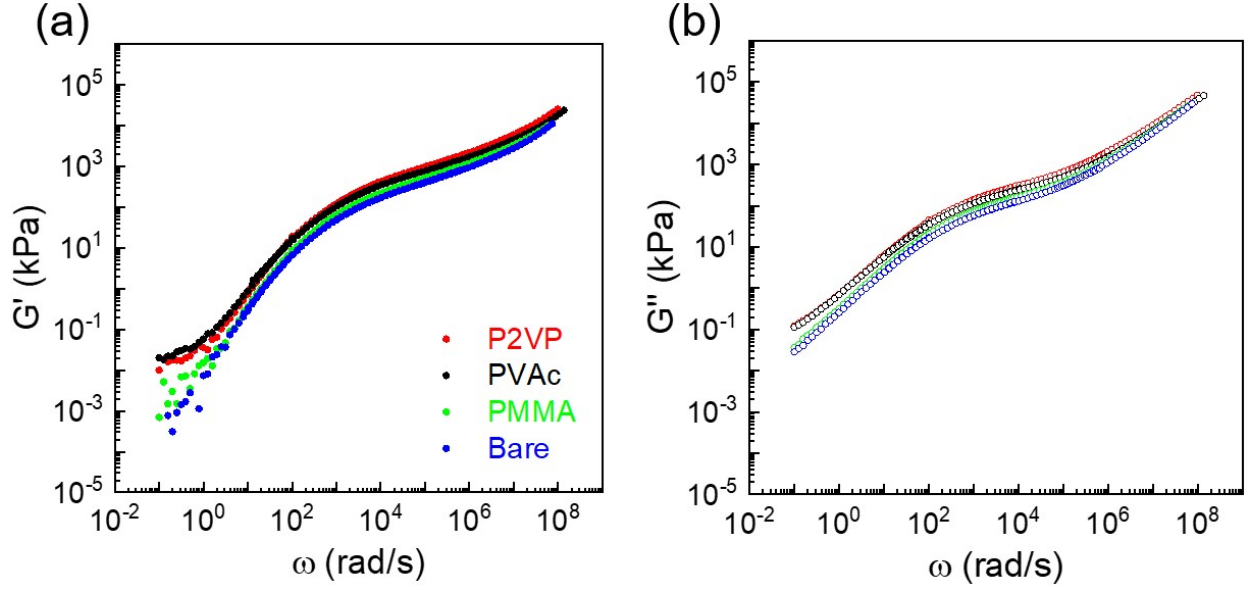

**Figure S3.** TTS data of polymer adsorbed SiO<sub>2</sub> composites. **(a)** Storage moduli and **(b)** loss moduli of composites. The reference temperature is 140 °C.

#### SAXS data analysis of PMA-SiO<sub>2</sub> Composites:

The SAXS data is analyzed by fitting the Unified model<sup>2</sup>:

$$I(q) = \sum_{i=1}^n \left[ G_i \exp\left(-\frac{q^2 R_{gi}^2}{3}\right) + B_i \exp\left(-\frac{q^2 R_{g(i+1)}^2}{3}\right) \left\{ \left[ \operatorname{erf}\left(\frac{q R_{g,i}}{\sqrt{6}}\right) \right]^3 / q \right\}^{P_i} \right]$$

$G_i$  is the Guinier prefactor,  $B_i$  is the prefactor specific to the type of power-law scattering,  $R_{gi}$  is the structural size, and  $p_i$  is the power-law exponent that determines the shape of fractals,  $n$  represents the maximum number of structural levels for fitting.

**Table S1.** The number of levels for unified function and corresponding  $R_g$  (nm) are listed. The

ratio between  $G_i$  represents the population of different  $R_{gi}$ 's.

| Sample | n | $R_{g1}$ | $R_{g2}$ | $R_{g3}$ | $R_{g4}$ | $R_{g5}$ | $G_1:G_2:G_3:G_4:G_5$ |
|--------|---|----------|----------|----------|----------|----------|-----------------------|
| bare   | 1 | 7.2±0.2  | -        | -        | -        | -        | -                     |
| PMMA   | 2 | 10.8±1   | 123±10   | -        | -        | -        | 1:30                  |
| PVAc   | 3 | 12.4±2   | 39.5±5   | 87.5±5   | -        | -        | 1:13:41               |
| P2VP   | 5 | 9.5±0.5  | 26.8±2   | 77.5±4   | 165±7    | 176±5    | 1:12:213:894:342      |

## References

1. Wu, D.; Feng, Y.; Li, R.; Ozisik, R.; Akcora, P., Entanglement density and particle dynamics in rigid interfacial layers of polymer nanocomposites. *J. Appl. Phys.* **2021**, *130* (6), 064701.
2. Beaucage, G., Approximations Leading to a Unified Exponential/Power-Law Approach to Small-Angle Scattering. *J. Appl. Crystallogr.* **1995**, *28* (6), 717-728.
